# Supplementary material for: Improving lysosomal ferroptosis with NMN administration protects against heart failure
Source: PubMed Central journal article supplement (PMC10551641; doi:10.26508/lsa.202302116), 2023-10-04

Figure 4

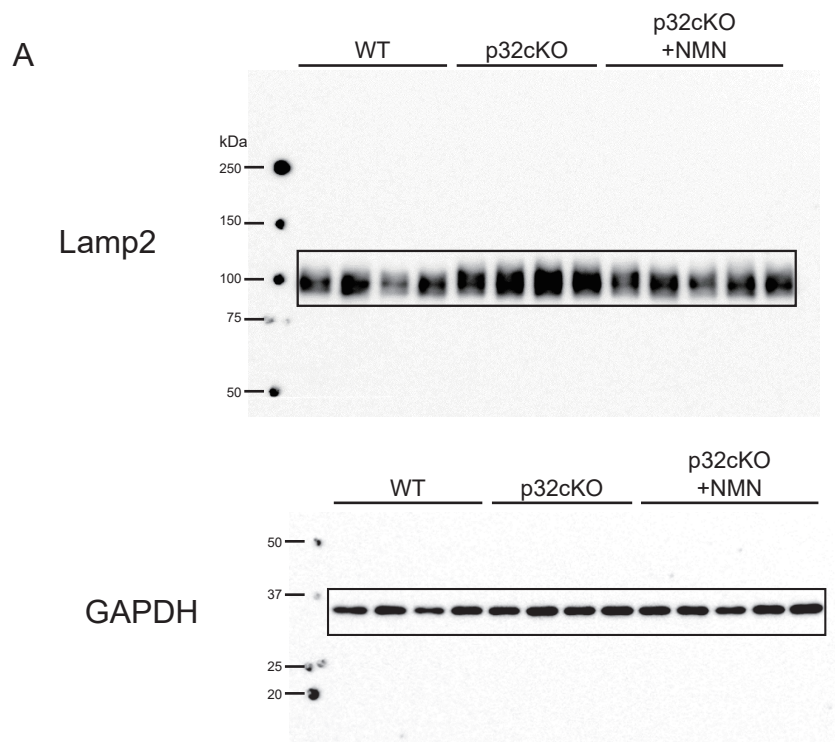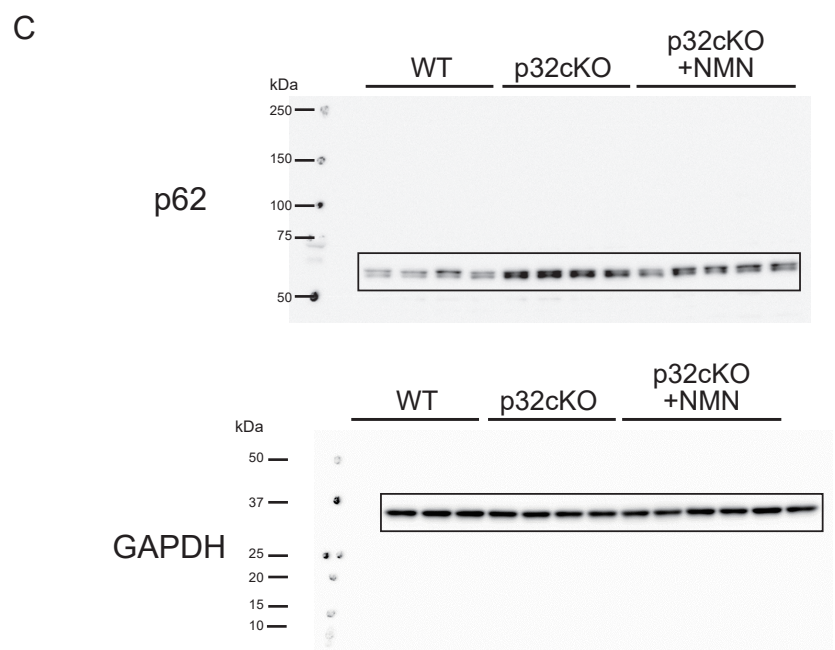

Supplement: LSA-2023-02116_SdataF4.pdf [file LSA-2023-02116_SdataF4.pdf]
